# Supplementary material for: Evaluation of Forgotten Joint Score in total hip arthroplasty with Oxford Hip Score as reference standard
Source: PubMed Central journal article supplement (PMC6534202; doi:10.1080/17453674.2019.1599252), 2019-04-01
Supplement: IORT_A_1599252_SM6420.pdf [file IORT_A_1599252_SM6420.pdf]

## Supplementary data

**Table 2. Reasons for non-participation given by patients when receiving a reminder phone call**

| Reason for non-participation                              | Number of patients |
|-----------------------------------------------------------|--------------------|
| Not answering phone call                                  | 30                 |
| Missing valid phone number                                | 7                  |
| Recent illness/hospitalized                               | 5                  |
| On vacation                                               | 1                  |
| Dissatisfied with the surgery                             | 2                  |
| Not interested                                            | 16                 |
| Accepted participation, but did not return questionnaires | 15                 |
| Total                                                     | 76                 |

**Table 3. Forgotten Joint Score: distribution of answers for each question**

| Question no. | FJS answer |    |    |    |    | Total |
|--------------|------------|----|----|----|----|-------|
|              | 1          | 2  | 3  | 4  | 5  |       |
| 1            | 58         | 33 | 2  | 14 | 10 | 117   |
| 2            | 53         | 20 | 10 | 19 | 15 | 117   |
| 3            | 57         | 13 | 9  | 22 | 16 | 117   |
| 4            | 77         | 13 | 8  | 11 | 9  | 118   |
| 5            | 59         | 18 | 13 | 20 | 6  | 116   |
| 6            | 50         | 25 | 9  | 14 | 20 | 118   |
| 7            | 43         | 19 | 15 | 23 | 17 | 117   |
| 8            | 40         | 22 | 12 | 23 | 21 | 118   |
| 9            | 42         | 21 | 18 | 20 | 17 | 118   |
| 10           | 41         | 24 | 19 | 20 | 14 | 118   |
| 11           | 42         | 16 | 11 | 26 | 20 | 115   |
| 12           | 39         | 19 | 11 | 11 | 18 | 117   |

The discrepancy in total numbers is explained by incompletely answered questionnaires by some patients.

**Table 4. Oxford Hip Score: distribution of answers for each question**

| Question no. | OHS answer |    |    |   |    | Total |
|--------------|------------|----|----|---|----|-------|
|              | 0          | 1  | 2  | 3 | 4  |       |
| 1            | 74         | 28 | 9  | 3 | 4  | 118   |
| 2            | 90         | 18 | 10 | 1 |    | 119   |
| 3            | 78         | 18 | 19 | 4 |    | 119   |
| 4            | 68         | 34 | 9  | 8 |    | 119   |
| 5            | 86         | 22 | 8  | 1 | 1  | 118   |
| 6            | 80         | 12 | 10 | 5 | 8  | 115   |
| 7            | 72         | 28 | 8  | 9 | 1  | 118   |
| 8            | 87         | 13 | 10 | 1 | 6  | 117   |
| 9            | 71         | 25 | 3  | 8 | 10 | 117   |
| 10           | 86         | 10 | 12 | 6 | 4  | 118   |
| 11           | 81         | 13 | 14 | 7 | 3  | 118   |
| 12           | 94         | 5  | 11 | 2 | 6  | 118   |

The discrepancy in total numbers is explained by incompletely answered questionnaires by some patients.
